# Supplementary material
Source: PubMed Central journal article supplement (PMC3202965)

Normal

Tumor

UPN379929  
25310680, C>T  
P904L

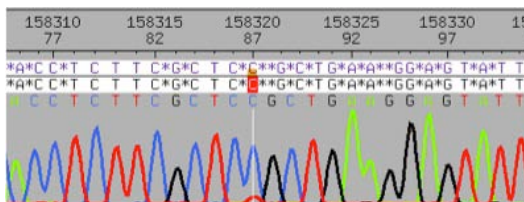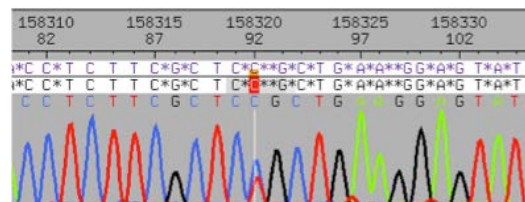

UPN317598  
25310746, G>A  
R882H

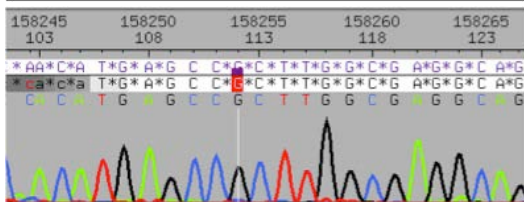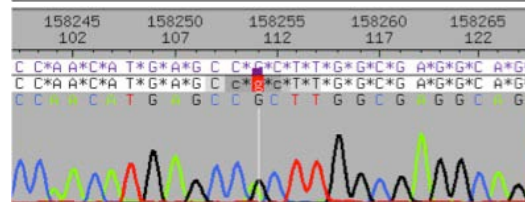

UPN457721  
25310746, G>A  
R882H

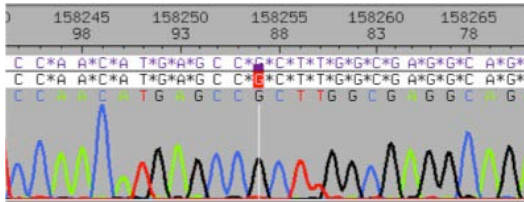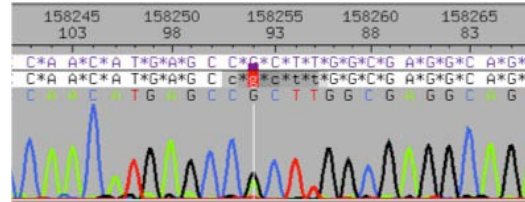

UPN958595  
25310746, G>A  
R882H

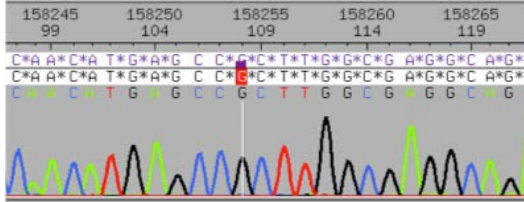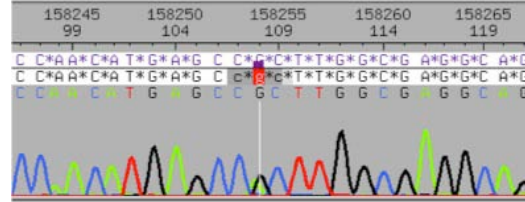

B

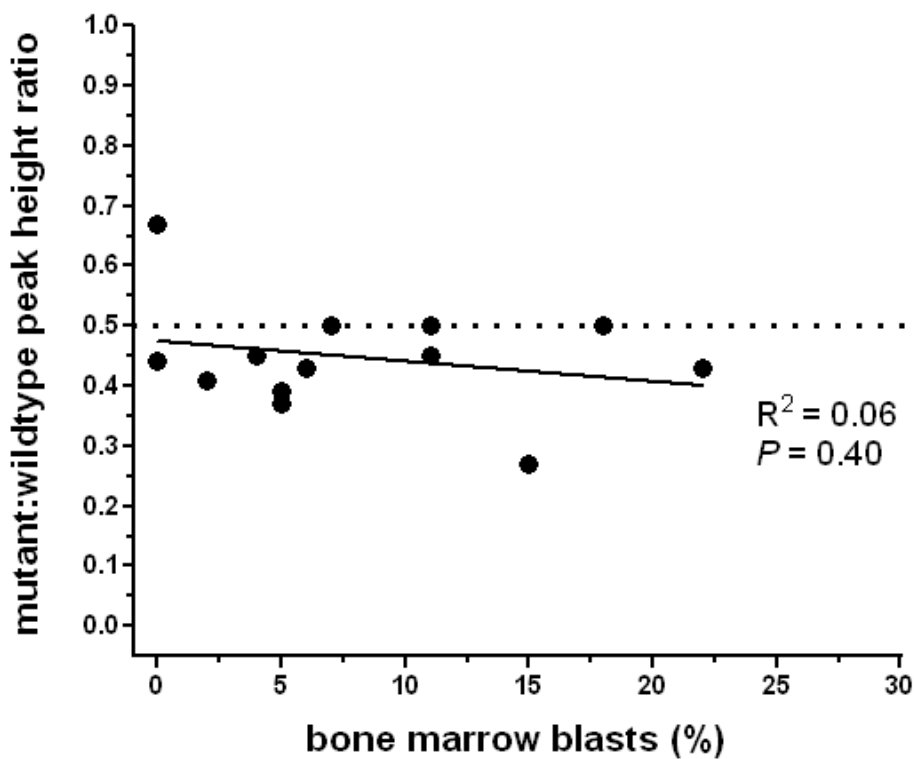

Supplemental Figure 1 (cont.)

Supplement: NIHMS271800-supplement-1.pdf [file NIHMS271800-supplement-1.pdf]

**A**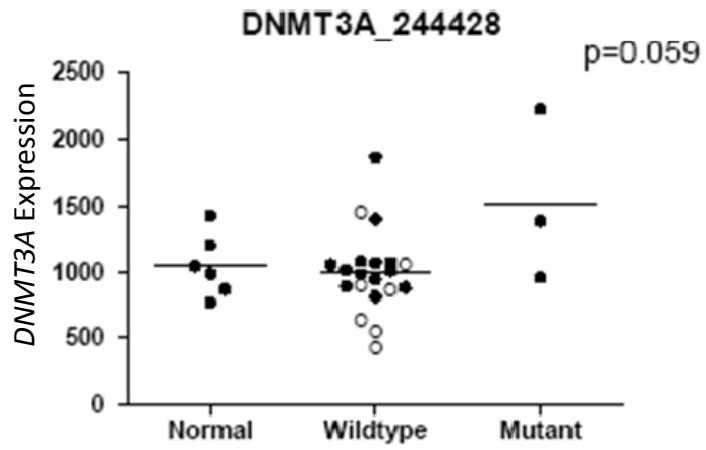**B**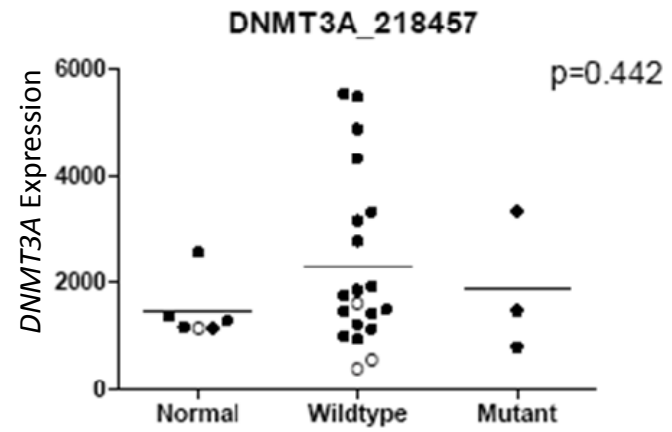**C**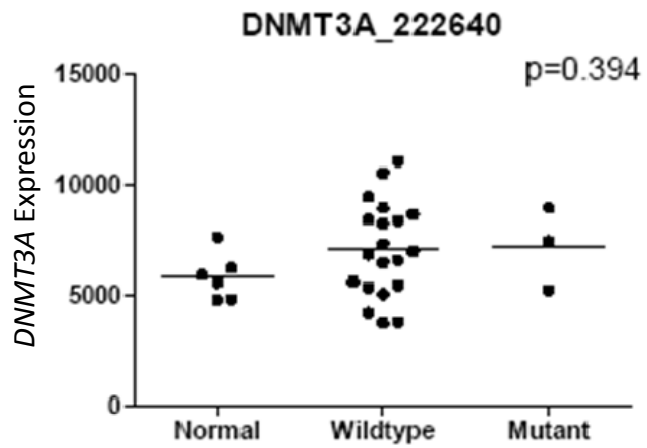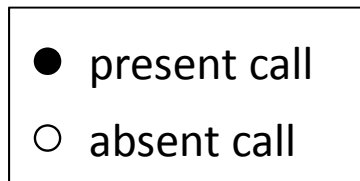

Supplemental Figure 2.

Supplement: NIHMS271800-supplement-2.pdf [file NIHMS271800-supplement-2.pdf]

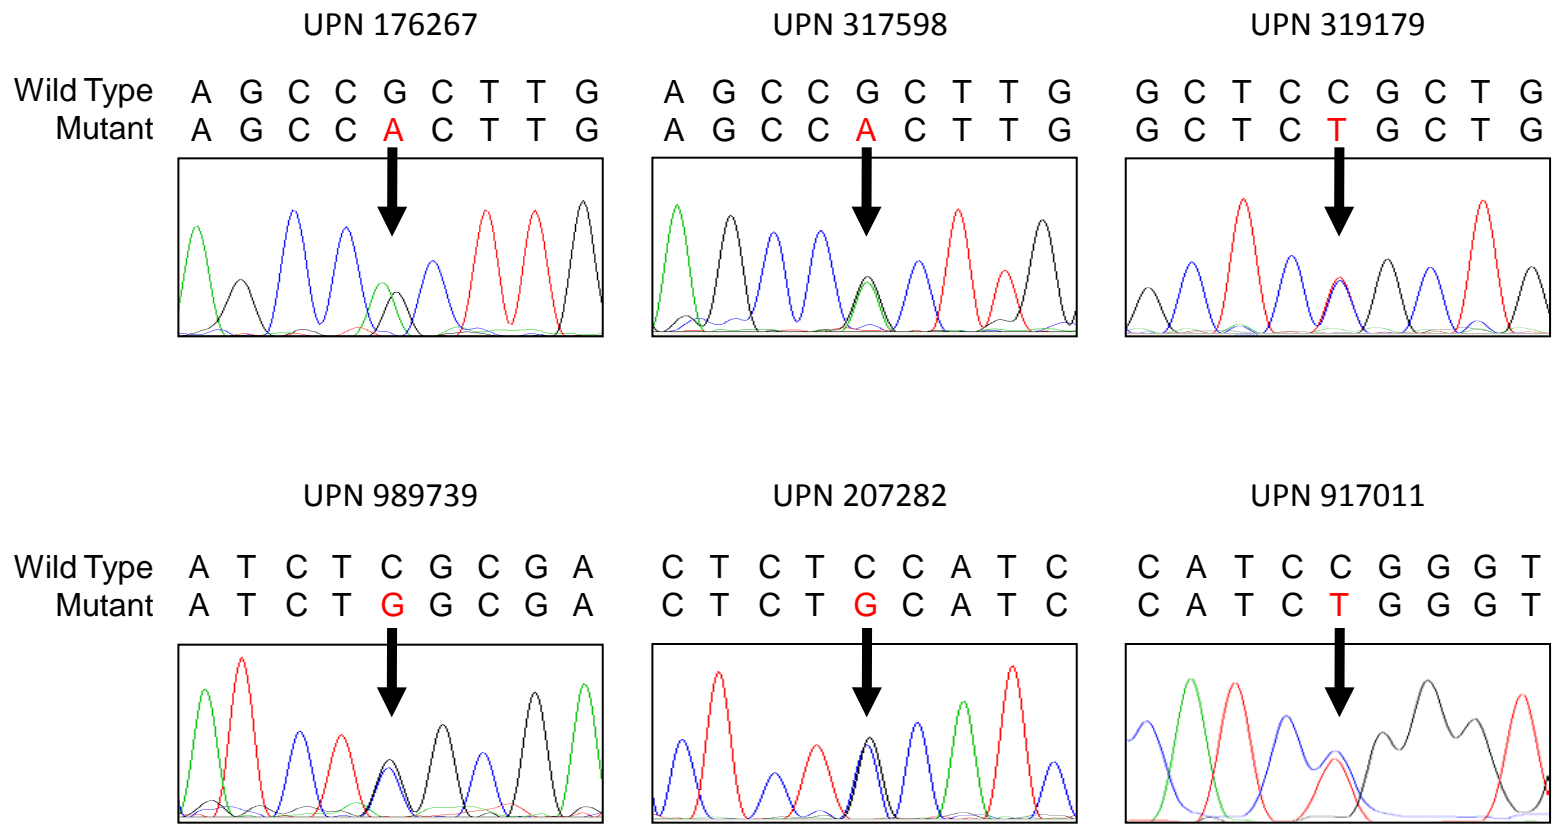

Supplemental Figure 3.

Supplement: NIHMS271800-supplement-3.pdf [file NIHMS271800-supplement-3.pdf]
